# Supplementary material for: Research and application of ceramic identification and traceability methods based on SIFT and blockchain
Source: PeerJ journal article supplement (doi:10.7717/peerj-cs.3325), 2025-10-29
Supplement: Table_S1.docx [file Table_S1.docx]

| ParamType | HighThresh | LowThresh | Precision | RMSE | Inliers | Runtime(s) | Pair |
| --- | --- | --- | --- | --- | --- | --- | --- |
| Canny | 60 | 30 | 1 | 0.0199 | 1684 | 3.8693 | S1_pair1 |
| Canny | 60 | 24 | 1 | 0.02 | 1676 | 1.3632 | S1_pair1 |
| Canny | 60 | 20 | 1 | 0.02 | 1672 | 1.4279 | S1_pair1 |
| Canny | 90 | 45 | 1 | 0.0198 | 1707 | 1.5303 | S1_pair1 |
| Canny | 90 | 36 | 1 | 0.0198 | 1705 | 1.2906 | S1_pair1 |
| Canny | 90 | 30 | 1 | 0.0198 | 1704 | 1.3012 | S1_pair1 |
| Canny | 120 | 60 | 1 | 0.0197 | 1712 | 1.2979 | S1_pair1 |
| Canny | 120 | 48 | 1 | 0.0198 | 1710 | 1.2931 | S1_pair1 |
| Canny | 120 | 40 | 1 | 0.0198 | 1710 | 1.3007 | S1_pair1 |
| Canny | 150 | 75 | 1 | 0.0197 | 1711 | 1.3337 | S1_pair1 |
| Canny | 150 | 60 | 1 | 0.0197 | 1713 | 1.355 | S1_pair1 |
| Canny | 150 | 50 | 1 | 0.0197 | 1712 | 1.3104 | S1_pair1 |
| Canny | 200 | 20 | 1 | 0.0197 | 1713 | 1.2994 | S1_pair1 |
| Canny | 60 | 30 | 1 | 0.0228 | 2170 | 1.3385 | S1_pairN |
| Canny | 60 | 24 | 1 | 0.023 | 2158 | 1.3386 | S1_pairN |
| Canny | 60 | 20 | 1 | 0.0229 | 2159 | 1.3483 | S1_pairN |
| Canny | 90 | 45 | 1 | 0.0227 | 2191 | 1.3223 | S1_pairN |
| Canny | 90 | 36 | 1 | 0.0227 | 2187 | 2.1309 | S1_pairN |
| Canny | 90 | 30 | 1 | 0.0227 | 2183 | 1.8731 | S1_pairN |
| Canny | 120 | 60 | 1 | 0.0228 | 2197 | 1.5975 | S1_pairN |
| Canny | 120 | 48 | 1 | 0.0226 | 2195 | 1.4596 | S1_pairN |
| Canny | 120 | 40 | 1 | 0.0227 | 2195 | 1.6043 | S1_pairN |
| Canny | 150 | 75 | 1 | 0.0226 | 2200 | 1.6076 | S1_pairN |
| Canny | 150 | 60 | 1 | 0.0227 | 2198 | 1.6524 | S1_pairN |
| Canny | 150 | 50 | 1 | 0.0227 | 2198 | 1.3712 | S1_pairN |
| Canny | 200 | 20 | 1 | 0.0226 | 2202 | 1.3431 | S1_pairN |
| Canny | 60 | 30 | 0 | 0 | 0 | 1.4844 | S4_false |
| Canny | 60 | 24 | 0 | 0 | 0 | 1.2308 | S4_false |
| Canny | 60 | 20 | 0 | 0 | 0 | 1.174 | S4_false |
| Canny | 90 | 45 | 0 | 0 | 0 | 1.1946 | S4_false |
| Canny | 90 | 36 | 0 | 0 | 0 | 1.2309 | S4_false |
| Canny | 90 | 30 | 0 | 0 | 0 | 1.2246 | S4_false |
| Canny | 120 | 60 | 0 | 0 | 0 | 1.2261 | S4_false |
| Canny | 120 | 48 | 0 | 0 | 0 | 1.2054 | S4_false |
| Canny | 120 | 40 | 0 | 0 | 0 | 1.2417 | S4_false |
| Canny | 150 | 75 | 0 | 0 | 0 | 1.1714 | S4_false |
| Canny | 150 | 60 | 0 | 0 | 0 | 1.2804 | S4_false |
| Canny | 150 | 50 | 0 | 0 | 0 | 1.1422 | S4_false |
| Canny | 200 | 20 | 0 | 0 | 0 | 1.1303 | S4_false |
