# Supplementary material for: Research and application of ceramic identification and traceability methods based on SIFT and blockchain
Source: PeerJ journal article supplement (doi:10.7717/peerj-cs.3325), 2025-10-29
Supplement: Table_S2.docx [file Table_S2.docx]

| ParamType | Theta | Tau | Precision | RMSE | Inliers | Runtime(s) |
| --- | --- | --- | --- | --- | --- | --- |
| AdaLAM | 12 | 0.15 | 1 | 0.0245 | 1638 | 1.3615 |
| AdaLAM | 12 | 0.2 | 1 | 0.0239 | 1808 | 1.3128 |
| AdaLAM | 12 | 0.25 | 1 | 0.0236 | 1918 | 1.3537 |
| AdaLAM | 15 | 0.15 | 1 | 0.0241 | 1707 | 1.3742 |
| AdaLAM | 15 | 0.2 | 1 | 0.0233 | 1883 | 1.3994 |
| AdaLAM | 15 | 0.25 | 1 | 0.023 | 1997 | 1.4106 |
| AdaLAM | 18 | 0.15 | 1 | 0.0235 | 1745 | 1.6536 |
| AdaLAM | 18 | 0.2 | 1 | 0.023 | 1923 | 1.499 |
| AdaLAM | 18 | 0.25 | 1 | 0.0227 | 2038 | 1.549 |
